# Supplementary material for: Fast and Non-Invasive Electronic Nose Devices for Screening Out COVID-19 Virus Infection Based on Exhaled Breath VOC Detection
Source: MDPI journal article supplement (doi:10.3390/chemosensors14010001), 2025-12-19
Supplement: s1 [file chemosensors-3979560-supplementary.pdf › chemosensors-3979560-supplementary.pdf]

# Supplemental information of “Fast and Non-Invasive Electronic Nose Devices for Screening Out COVID-19 Virus Infection Based on Exhaled Breath VOC Detection”

Woosuck Shin,<sup>1</sup> Toshio Itoh,<sup>1</sup> Yoshitake Masuda,<sup>1</sup> Takehiro Kitawaki,<sup>2</sup> and Makoto Sawano<sup>2</sup>

<sup>1</sup> National Institute of Advanced Industrial Science and Technology (AIST), Sakurazaka,  
Moriyama-ku, Nagoya 463-8560, Japan

<sup>2</sup> Center for Advanced Emergency Medicine and Critical Care, Saitama Medical Center,  
Kawagoe,  
350-8550, Japan

E-mail: w.shin@aist.go.jp

Corresponding author: Woosuck SHIN, E-mail: w.shin@aist.go.jp; Tel.: +81-50-3522-7894

Two detector of A and B containing an array of 8 sensors, which were commercial sensors and in-house sensors, respectively are used in this study, as listed in Table S1. Commercial sensors are semiconductor MOX sensors of TGS 2600, TGS2602, TGS2603, TGS2610, TGS2611, TGS2612, TGS2620, and TGS2644 (Figaro Engineering Inc., Minoh, Japan). The commercial sensors selected from the TGS series were, which were recognized as long term stable and highly sensitive in the gas sensor industry for VOC measurement. For comparison, a in-house sensors consisting of p-type LaFeO<sub>3</sub>, n-types SnO<sub>2</sub>, ZnO, Ce<sub>0.9</sub>Zr<sub>0.1</sub>O<sub>2</sub> (CeZr10), and noble metals loaded were also prepared.

Table S1. Semiconductor gas sensors and theirs features installed in the detector A and detector B.

| <b>Detector</b> | <b>Sensor</b>        | <b>Detection target</b>              | <b>features</b>             |
|-----------------|----------------------|--------------------------------------|-----------------------------|
| <b>A</b>        | TGS2600              | H <sub>2</sub> and ethanol           | High durability             |
|                 | TGS2602              | Ethanol, VOCs and H <sub>2</sub> S   | High sensitivity            |
|                 | TGS2603              | TMA, CH <sub>3</sub> SH etc.         | Bad odor                    |
|                 | TGS2610              | Liquefied petroleum (LP) gas         | Quick response for leakage  |
|                 | TGS2611              | CH <sub>4</sub> and LP gas           | Quick response for leakage  |
|                 | TGS2612              | CH <sub>4</sub> , propane, isobutane | Suppressed ethanol response |
|                 | TGS2620              | Ethanol, and organic solvents        | Ethanol detection           |
|                 | TGS2444              | TMA, NH <sub>3</sub> etc.            | For higher concentration    |
| <b>B</b>        | ZnO                  | Inflammable gas                      | surface-reaction type       |
|                 | M/ZnO                | Inflammable gas                      | metal catalyzed             |
|                 | SnO <sub>2</sub>     | H <sub>2</sub> and VOCs              | surface-reaction type       |
|                 | M/SnO <sub>2</sub>   | VOCs and Aldehyde                    | metal catalyzed             |
|                 | LaFeO <sub>3</sub>   | Acetone                              | p-type                      |
|                 | M/LaFeO <sub>3</sub> | Acetone                              | p-type, metal catalyzed     |
|                 | CeZr10               | H <sub>2</sub> and VSCs              | Bulk response type          |
|                 | M/CeZr10             | VSCs                                 | metal catalyzed             |

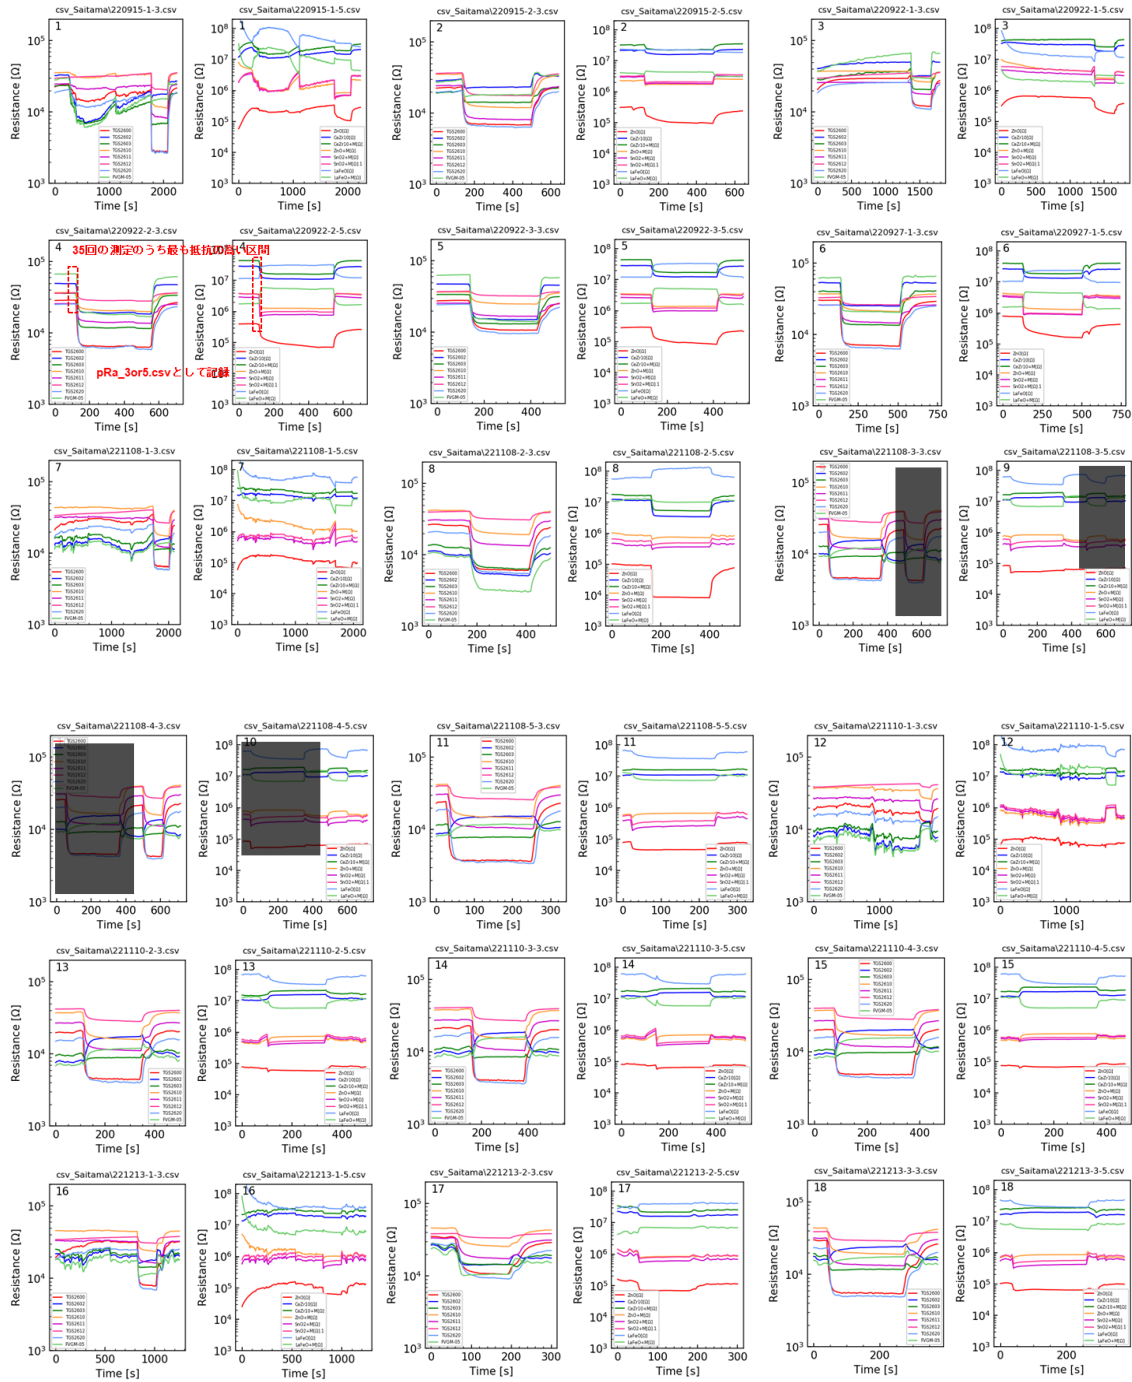

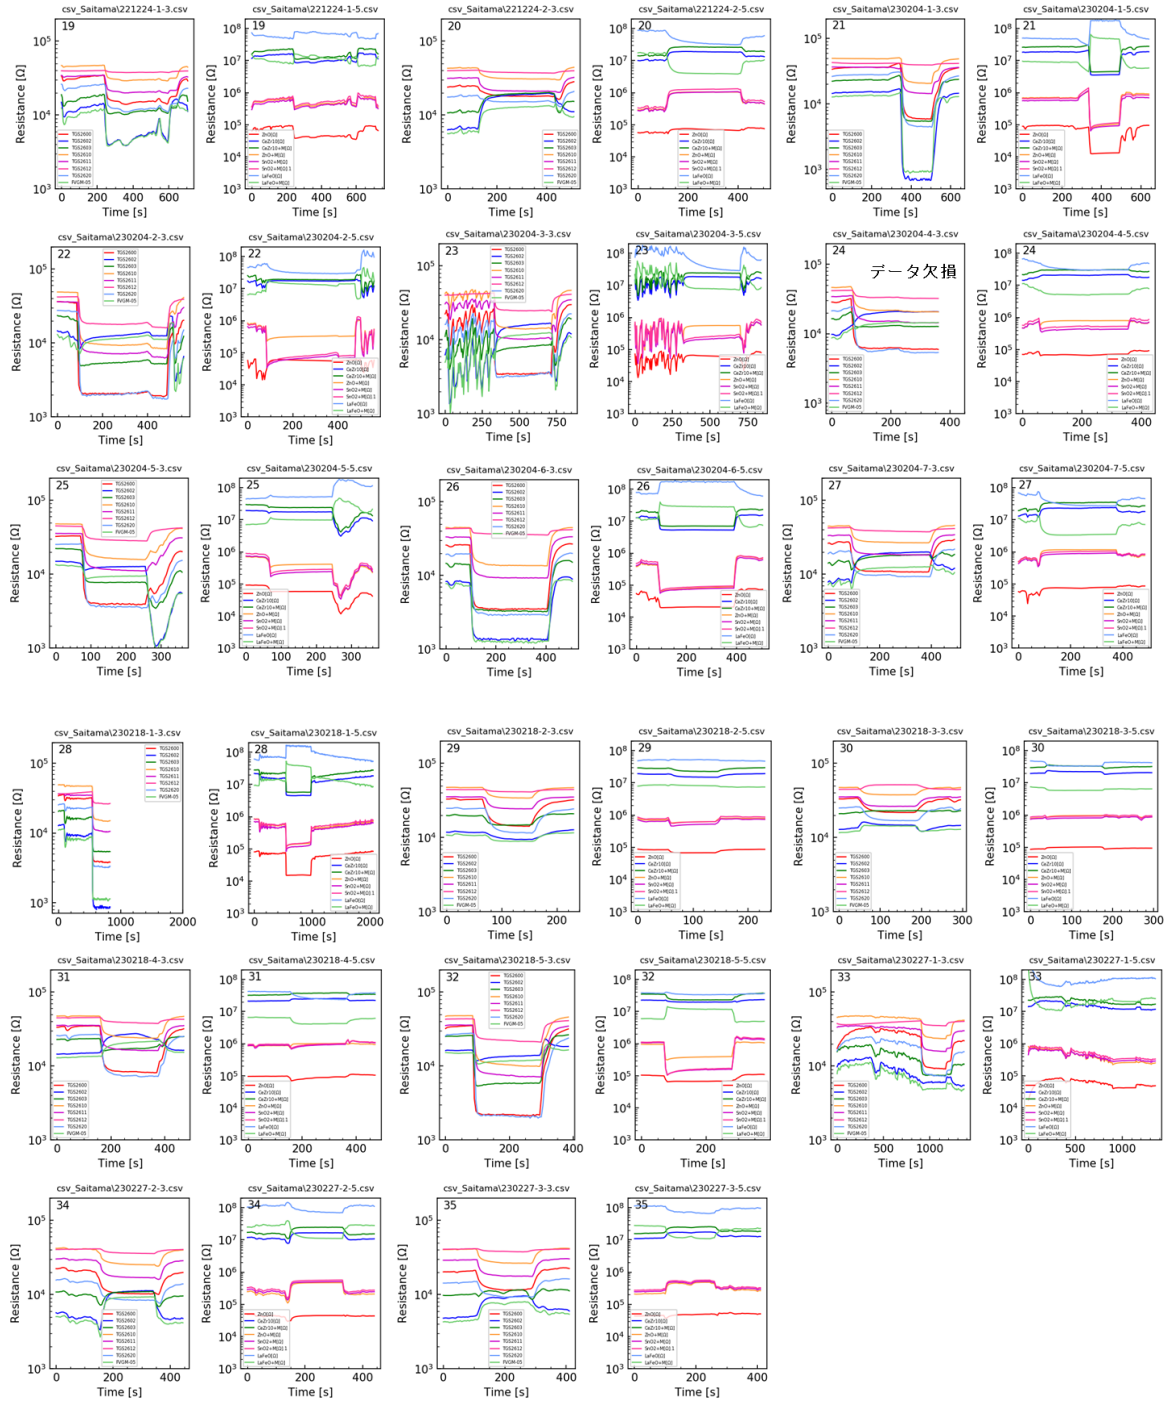

Figure S1. Resistance-change behavior of the gas sensors of the two VOC detectors to the breath of COVID19. The response of black-shaded area is not used in the analysis.

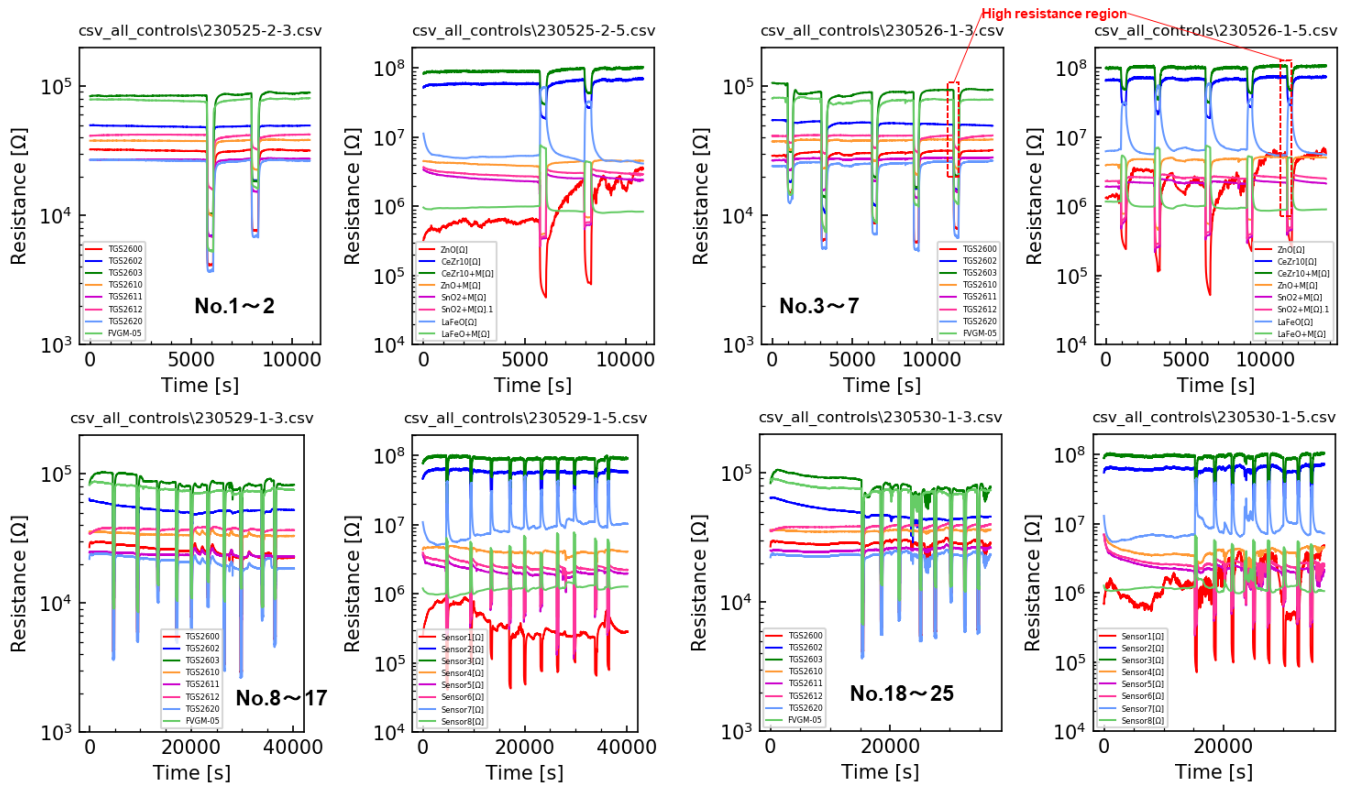

Figure S2. Resistance-change behavior of the gas sensors of the two VOC detectors to the breath of control.

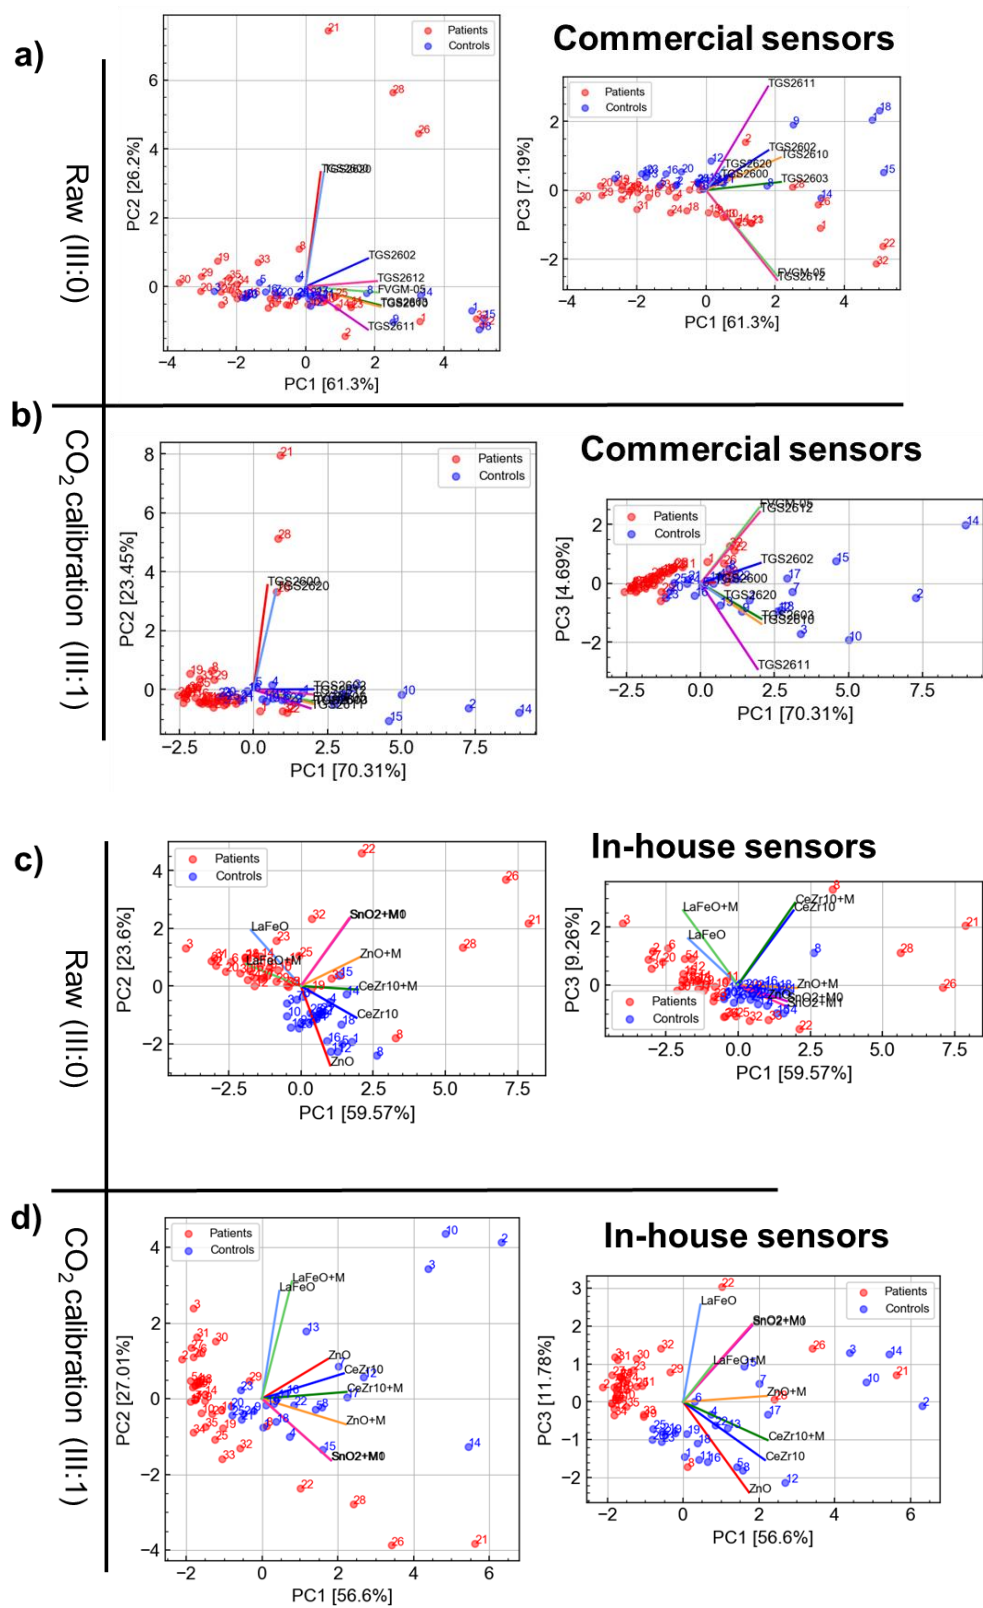

Figure S3. PCA analysis of the two VOC detectors. Two plots of PC1 vs. PC2, and PC1 and PC3 are shown.
